# Supplementary material
Source: publisher figshare collection journal article supplement (https://sage.figshare.com/ndownloader/files/17709863)
Supplement: Supplementary file 1 [file 17709863]

Supplementary Information (SI)

Pre- and post-gelation of the prepared hydrogels
